# Supplementary material
Source: ML conference proceedings conference paper supplement (https://openreview.net/forum?id=GH7QRzUDdXG)
Supplement: supplementary_material [file attachment]

# THE GEOMETRY OF DEEP GENERATIVE IMAGE MODELS AND ITS APPLICATIONS

**Anonymous authors**

Paper under double-blind review

## ABSTRACT

Generative adversarial networks ([GANs](#)) have emerged as a powerful unsupervised method to model the statistical patterns of real-world data sets, such as natural images. These networks are trained to map random inputs in their latent space to new samples representative of the learned data. However, the structure of the latent space is hard to intuit due to its high dimensionality and the non-linearity of the generator, which limits the usefulness of the models. Understanding the latent space requires a way to identify input codes for existing real-world images (inversion), and a way to identify directions with known image transformations (interpretability). Here, we use a geometric framework to address both issues simultaneously. We develop an architecture-agnostic method to compute the Riemannian metric of the image manifold created by GANs. The eigen-decomposition of the metric isolates axes that account for different levels of image variability. An empirical analysis of several pretrained GANs shows that image variation around each position is concentrated along surprisingly few major axes (the space is highly anisotropic) and the directions that create this large variation are similar at different positions in the space (the space is homogeneous). We show that many of the top eigenvectors correspond to interpretable transforms in the image space, with a substantial part of eigenspace corresponding to minor transforms which could be compressed out. This geometric understanding unifies ~~previous results of GAN inversion and interpretation~~[key previous results related to GAN interpretability](#). We show that the use of this metric allows for more efficient optimization in the latent space (e.g. GAN inversion) and facilitates unsupervised discovery of interpretable axes. Our results ~~show~~[illustrate](#) that defining the geometry of the GAN image manifold can serve as a general framework for understanding GANs.

## 1 BACKGROUND

Generative adversarial networks (GANs) learn patterns that characterize complex datasets, and subsequently generate new samples representative of that set. In recent years, there has been tremendous success in training GANs to generate high-resolution and photorealistic images (Karras et al., 2017; Brock et al., 2018; Donahue & Simonyan, 2019; Karras et al., 2020). Well-trained GANs show smooth transitions between image outputs when interpolating in their latent input space, which makes them useful in applications such as high-level image editing (changing attributes of faces), object segmentation, and image generation for art and neuroscience (Zhu et al., 2016; Shen et al., 2020; Pividori et al., 2019; Elgammal et al., 2017; Ponce et al., 2019). However, there is no systematic approach for understanding the latent space of any given GAN or its relationship to the manifold of natural images.

Because a generator provides a smooth map onto image space, one relevant conceptual model for GAN latent space is a Riemannian manifold. To define the structure of this manifold, we have to ask questions such as: are images homogeneously distributed on a sphere? (White, 2016) What is the structure of its tangent space — do all directions induce the same amount of variance in image transformation? Here we develop a method to compute the metric of this manifold and investigate its geometry directly, and then use this knowledge to navigate the space and improve several applications.

To define a Riemannian geometry, we need to have a smooth map and a notion of distance on it, defined by the metric tensor. For image applications, the relevant notion of distance is in image space rather than code space. Thus, we can pull back the distance function on the image space onto the latent space. Differentiating this distance function on latent space, we will get a differential geometric structure (Riemannian metric) on the image manifold. Further, by computing the Riemannian metric at different points (i.e. around different latent codes), we can estimate the anisotropy and homogeneity of this manifold.

The paper is organized as follows: first, we review the previous work using tools from Riemannian geometry to analyze generative models in section 2. Using this geometric framework, we introduce an efficient way to compute the metric tensor  $H$  on the image manifold in section 3, and empirically investigate the properties of  $H$  in various GANs in section 4. We explain the properties of this metric in terms of network architecture and training in section 5. We show that this understanding provides a **unified-unifying** principle behind previous methods for **GAN-inversion-and-for** interpretable axes discovery in the latent space. Finally, we demonstrate other applications that this geometric information could facilitate, e.g. gradient-free searching in the GAN image manifold in section ??.

## 2 RELATED WORK

**Geometry of Deep Generative Model** Concepts in Riemannian geometry have been recently applied to illuminate the structure of latent space of generative models (i.e. GANs and variational autoencoders, VAEs). Shao et al. (2018) designed algorithms to compute the geodesic path, parallel transport of vectors and geodesic shooting in the latent space; they used finite difference together with a pretrained encoder to circumvent the Jacobian computation of the generator. While promising, this method did not provide information of the metric directly and could not be applied to GANs without encoders. Arvanitidis et al. (2017) focused on the geometry of VAEs, deriving a formula for the metric tensor in order to solve the geodesic in the latent space; this worked well with shallow convolutional VAEs and low-resolution images (28 x 28 pixels). Chen et al. (2018) computed the geodesic through minimization, applying their method on shallow VAEs trained on MNIST images and a low-dimensional robotics dataset. In the above, the featured methods could only be applied to neural networks without ReLU activation. Here, we apply the geometric analysis to modern large-scale GANs (e.g. BigGAN, StyleGAN2) and we show it is compatible with any activation function. Finally, all previous works assumed a L2 distance in image space, and here we extend this approach to any differentiable distance metric.

## 3 METHODS

**Formulation** A generative network, denoted by  $G$ , is a mapping from latent code  $z$  to image  $I$ ,  $G : \mathbb{R}^n \rightarrow \mathcal{I} = \mathbb{R}^{H \times W \times 3}$ ,  $z \mapsto I$ . Borrowing the language of Riemannian geometry,  $G(z)$  parameterizes a submanifold in the image space with  $z \in \mathbb{R}^n$ . Note for applications in image domain, we care about distance in the image space. Thus, given a distance function in image space  $D : \mathcal{I} \times \mathcal{I} \rightarrow \mathbb{R}_+$ ,  $(I_1, I_2) \mapsto L$ , we can define the distance between two codes as the distance between the images they generate, i.e. pullback the distance function to latent space through  $G$ .  $d : \mathbb{R}^n \times \mathbb{R}^n \rightarrow \mathbb{R}_+$ ,  $d(z_1, z_2) := D(G(z_1), G(z_2))$ .

The Hessian matrix (second order partial derivative) of **the** squared distance function  $d^2$  can be seen as the metric tensor of the image manifold (Palais, 1957). The intuition behind this is as follows. **Consider-; consider** the squared distance to a fixed reference vector  $z_0$  as a function of  $z$ ,  $f_{z_0}(z) = d^2(z_0, z)$ . Obviously,  $z = z_0$  is a local minimum of  $f_{z_0}(z)$ , thus  $f_{z_0}(z)$  can be locally approximated by a positive semi-definite quadratic form  $H(z_0)$  as in Eq.1. This matrix induces an inner product and defines a vector norm,  $\|v\|_H^2 = v^T H(z_0) v$ . This squared vector norm approximates the squared image distance,  $d^2(z_0, z_0 + \delta z) \approx \|\delta z\|_H^2 = \delta_z^T H(z_0) \delta z$ . Thus, this matrix encodes the local distance information on the image manifold up to second order approximation. This is the intuition behind Riemannian metric. In this article, the terms "metric tensor" and "Hessian matrix" are used interchangeably. We will call  $\alpha_H(v) = v^T H v / v^T v$  the approximate speed

of image change along  $\mathbf{v}$  as measured by metric  $H$ .

$$d^2(\mathbf{z}_0, \mathbf{z}) \approx \underbrace{d^2(\mathbf{0}, \mathbf{0})}_{\text{constant}} + \underbrace{\frac{\partial d^2(\mathbf{z}_0, \mathbf{z})}{\partial \mathbf{z}}|_{\mathbf{z}_0}}_{\text{gradient}} \delta \mathbf{z} + \underbrace{\frac{1}{2} \frac{\partial^2 d^2(\mathbf{z}_0, \mathbf{z})}{\partial \mathbf{z}^2}|_{\mathbf{z}_0}}_{\text{Hessian}} \delta \mathbf{z}^2 = \underbrace{\frac{\partial^2 d^2(\mathbf{z}_0, \mathbf{z})}{\partial \mathbf{z}^2}|_{\mathbf{z}_0}}_{\text{Hessian}} \delta \mathbf{z}^2, \quad H(\mathbf{z}_0) := \frac{\partial^2 d^2(\mathbf{z}_0, \mathbf{z})}{\partial \mathbf{z}^2}|_{\mathbf{z}_0} \quad (1)$$

**Numerical Method** As defined above, the metric tensor  $H$  can be directly computed by doubly differentiating the squared distance function  $d^2$ . ~~In this paper Here~~ we use a CNN-based distance metric called Learned Perceptual Image Patch Similarity (LPIPS) (Zhang et al., 2018) ~~as our  $d^2$ , which is easily differentiable. Thus we can,~~ both because it is doubly differentiable and because ~~it has been demonstrated to approximate perceptual similarity judgements.~~ We compute the Hessian by building a computational graph towards the gradient  $\mathbf{g} = \partial_{\mathbf{z}} d^2$ ,  $\mathbf{g}(\mathbf{z}) = \partial_{\mathbf{z}} d^2|_{\mathbf{z}=\mathbf{z}_0}$  and then computing the gradient towards each element in  $\mathbf{g}(\mathbf{z})$ . This method computes  $H$  column by column, ~~thus therefore~~ its time complexity is proportional to ~~dimension of latent space the latent-space dimensionality~~  $n$  and ~~backpropagation time the backpropagation time through this graph~~.

For situations when computing the Hessian through ~~brute-force column-by-column~~ backpropagation is too slow (e.g. FC6GAN, StyleGAN2), we developed an ~~additional approximation~~ method to compute the major eigen-dimensions of the Hessian more efficiently. The rationale is ~~we are more interested in the top eigen-pairs of the Hessian matrix than in the Hessian itself that these top eigenpairs are more useful than the full Hessian in applications like optimization and exploration; moreover, the top eigen-pairs form the best low-rank approximation to the Hessian.~~ As we will later discover, the spectra of these matrices have a fast decay, thus these Hessian matrices require far less than  $n$  eigenvectors to approximate, cf. Sec 4. ~~Specifically, we use forward or reverse mode differentiation to define Hessian-vector~~ As a matrix, the Hessian is a linear operator, which could be defined as long as one can compute the Hessian vector product (HVP) ~~operator as Eq.7. Then we can use iterative algorithms to solve the large eigenvalues and eigenvectors for the HVP operator, and these eigen-pairs can in turn approximate.~~ Since the gradient to  $\mathbf{z}$  commutes with inner product with  $\mathbf{v}$ , HVP can be rewritten as the gradient to  $\mathbf{v}^T \mathbf{g}$ , or the directional derivative to the gradient  $\mathbf{v}^T \partial_{\mathbf{z}} \mathbf{g}$  (Eq.2). The first form  $\partial_{\mathbf{z}}(\mathbf{v}^T \mathbf{g})$  is easy to compute in reverse-mode auto-differentiation, and the directional derivative is easy to compute in forward-mode auto-differentiation (or finite differencing as in Eq.2). Then, Lanczos iterations are applied to the HVP operator defined in these two ways to solve the largest eigen pairs, which can reconstruct an approximate Hessian matrix. The iterative algorithm using the two HVP definitions are termed Backward Iteration and Forward Iteration respectively. For details and efficiency comparison, see Appendix A.2.

$$\text{HVP} : \mathbf{v} \mapsto H\mathbf{v} = \partial_{\mathbf{z}}(\mathbf{v}^T \mathbf{g}(\mathbf{z})) = \mathbf{v}^T \partial_{\mathbf{z}} \mathbf{g}(\mathbf{z}) \approx (\mathbf{g}(\mathbf{z} + \epsilon \mathbf{v}) - \mathbf{g}(\mathbf{z} - \epsilon \mathbf{v})) / 2\|\epsilon \mathbf{v}\| \quad (2)$$

Note a similar computational method has been employed to understand the optimization landscape of deep neural networks recently (Ghorbani et al., 2019), although it has not been applied ~~to understand towards~~ the geometry of latent space of GANs before.

**Connection to Jacobian** This formulation and computation of the Riemannian metric can be generalized to any representational space beyond that of images. Consider a mapping  $\phi(\mathbf{z}) : \mathbb{R}^n \rightarrow \mathbb{R}^M$ , which could be the feature map of a middle layer in the GAN, or a CNN processing the generated image. We can pull back the squared L2 distance and metric from  $\mathbb{R}^M$ ,  $d_{\phi}^2(\mathbf{z}_1, \mathbf{z}_2) = \frac{1}{2} \|\phi(\mathbf{z}_1) - \phi(\mathbf{z}_2)\|_2^2$ , and define a manifold. The metric tensor  $H_{\phi}$  of this manifold can be derived as Hessian of  $d_{\phi}^2$ . Note, there is a simple relationship between the Hessian of  $d_{\phi}^2$ ,  $H_{\phi}$  and the Jacobian of  $\phi$ ,  $J_{\phi}$  (Eq. 3). Through this we know the eigen spectrum of the Hessian matrix  $H_{\phi}$  is the square of ~~the~~ singular value spectrum of ~~the~~ Jacobian  $J_{\phi}$ , and the eigenvectors of  $H_{\phi}$  is the same as the right singular vectors of  $J_{\phi}$ . This allows us to examine the geometry of the representation through out the GAN, and analyze how the geometry in the image space builds up.

$$H_{\phi}(\mathbf{z}_0) = \frac{\partial^2}{\partial \mathbf{z}^2} \frac{1}{2} \|\phi(\mathbf{z}_0) - \phi(\mathbf{z})\|_2^2|_{\mathbf{z}_0} = J_{\phi}(\mathbf{z}_0)^T J_{\phi}(\mathbf{z}_0) \quad (3)$$

$$\mathbf{v}^T H_{\phi}(\mathbf{z}_0) \mathbf{v} = \|J_{\phi}(\mathbf{z}_0) \mathbf{v}\|^2, \quad J_{\phi}(\mathbf{z}_0) = \partial_{\mathbf{z}} \phi(\mathbf{z})|_{\mathbf{z}_0} \quad (4)$$

In this work, we use LPIPS, which defines image distance based on the squared L2 distance of the first few layers of a pretrained CNN. If we concatenate the activations and denote this representational map by  $\varphi(I) : \mathcal{I} \rightarrow \mathbb{R}^F$ , then the metric tensor of the image manifold can be derived from the Jacobian of the generator compositing representation map  $\varphi$ ,  $H(z) = J_{\varphi \circ G}^T J_{\varphi \circ G} = \partial_z \varphi(G(z))$ . This connection is crucial for understanding how geometry depends on the network architecture.

## 4 EMPIRICAL OBSERVATIONS

Using the above method, we analyzed the geometry of the latent space of the following GANs: DCGAN (Radford et al., 2015), DeePSiM/FC6GAN (Dosovitskiy & Brox, 2016), BigGAN (Brock et al., 2018), BigBiGAN (Donahue & Simonyan, 2019), Progressive Growing of GANs (PGGAN) (Karras et al., 2017), StyleGAN 1 and 2 (Karras et al., 2019; 2020). These GANs are progressively deeper and more complex, and some employ a style-based architecture instead of a more conventional DCGAN architecture (e.g. StyleGAN1,2). This diverse set of models allowed us to test the broad applicability of this new approach. In the following sections, "top" and "bottom" eigenvectors refer to the eigenvectors with large and small eigenvalues.

**Top Eigenvectors Capture Perceptually Relevant Significant Image Changes.** In differential geometry, a metric tensor  $H$  captures an infinitesimal notion of distance. To determine whether this quantity represents perceptually meaningful image changes, we randomly picked a latent code  $z_0$ , computed the metric tensor  $H(z_0)$  and its eigendecomposition  $H(z_0) = \sum_i \lambda_i v_i v_i^T$ . Then we explored linearly in the latent space along the eigenvectors  $G(z_0 + \mu_i v_i)$ . We found that images changed much faster when moving along top than along bottom eigenvectors, both per visual inspection and LPIPS (Fig 1). More intriguingly, eigenvectors at different ranks encoded qualitatively different types of changes; for example, in BigGAN noise space, the top eigenvectors encoded head direction, proximity and size; while lower eigenvectors encoded background changes, shading or much more subtle pixel-wise changes. Moreover, PGGAN and StyleGANs trained on the face dataset (FFHQ) have top eigenvectors that represent similar interpretable transforms of faces, such as head direction, sex or age (Fig. 9). These observations raised the possibility that top eigenvectors also captured perceptually relevant changes: we tested this directly with positive results (see Sec. 6).

**Spectrum Structure of GANs.** To explore how eigenvalues were distributed, for each GAN, we randomly sampled 100-1000  $z$  in the latent space, used backpropagation to compute  $H(z)$  and then performed the eigendecomposition. In Fig. 2, we plotted the mean and 90% confidence interval of the spectra and found that they spanned 5-10 orders of magnitude, with fast decays; each spectrum was dominated by a few eigenvectors with large eigenvalues. In other words, only a small fraction of dimensions were responsible for major image changes (Table 2), while most dimensions introduced nuanced changes (e.g. shading, background) — GAN latent spaces were highly anisotropic.

We found this anisotropy in every GAN we tested, which raises the question of why it had not been reported previously. One possibility is that the statistical properties of high dimensionality create an illusion of isotropy. When traveling along a random direction  $v$  in latent space, the approximate rate of image change  $\alpha_H(v) = v^T H v / v^T v$  is a weighted average of all eigenvalues as in Eq. 9. In Sec A.6, we show analytically that the variance of  $\alpha(v)$  across random directions will be  $2/(n+2)$  times smaller than the variance among eigenvalues. For example, in BigGAN latent space (256 dimensions), the eigenvalues span over six orders of magnitude, while the  $\alpha(v)$  for random directions has a standard deviation less than one order of magnitude (Figs. 2, 6). Further, the center of this distribution was closer to the top of the spectrum, and thus provided a reasonable rate of change, while masking the existence of eigendimensions of extremely large and small eigenvalues.

**Global Metric Structure** Because the metric  $H(z)$  describes local geometry, the next question is how it varies at different positions in the latent space. We computed the metric  $H(z)$  at randomly

<sup>1</sup>For some spaces, we used spherical linear exploration, where we restrict ourselves to a spherical manifold of certain norm. We project  $v_i$  onto tangent space of  $z_0$  and then exponential map travel on the big circle from  $z_0$  along  $v_i$ .



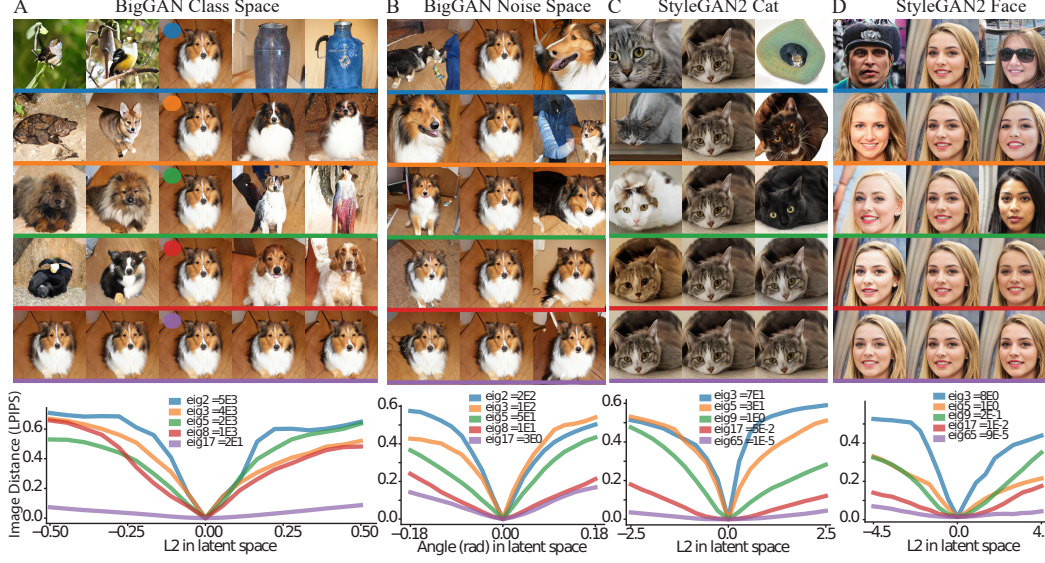

Figure 1: **Images change at different rates along top vs bottom eigenvectors.** Each panel (A-D) shows perturbations around a randomly chosen reference image (center column); each row shows perturbations introduced by moving along each of five eigenvectors; each contiguous column is separated by the same distance in latent space. Eigenvectors are shown in descending order of their eigenvalues. Line plots under each montage show the LPIPS image distance to the reference image as a function of positively and negatively perturbed distance along each eigenvector (x-axis). The rate of image change differed across eigenvectors; top vs bottom eigenvectors encoded changes such as object class, head direction, pose, color, shading or other subtle details (e.g. fur variations in panel A, bottom). **A. BigGAN-Class subspace; B. BigGAN Noise subspace; C. StyleGAN2-trained-on-cat images; D. StyleGAN2-trained-on-faces images.** Eigenvector rank and associated eigenvalue labeled in the legend.

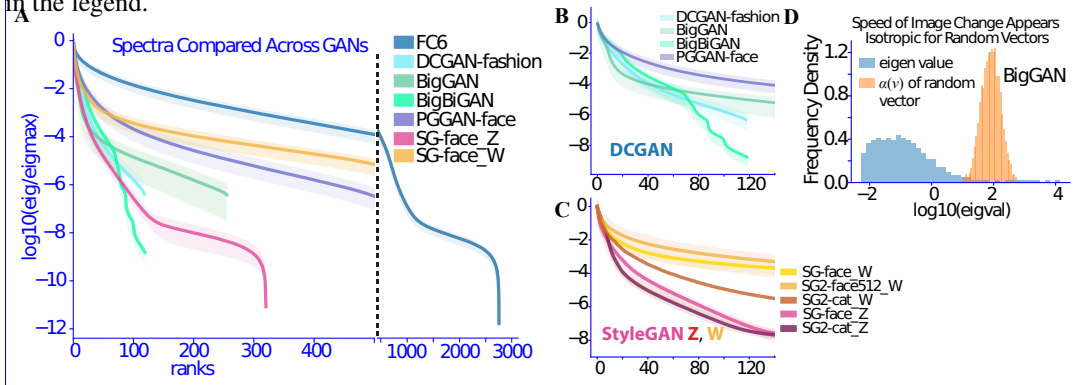

Figure 2: **Spectra of GANs**, shown as a function of individual model (A) and types of architecture (B, C). DCGAN-type (green-blue), Z and W space for StyleGAN (SG1, 2) (red, orange). Lines and shaded areas show the averaged spectra and the 5-95% percentile of each eigenvalue among samples (for quantification, see Table 2). D. Histogram of approximate speed of image change  $\alpha(v)$  for eigenvectors and random directions, visualizing the "illusion of isotropy".

selected  $z$  and examined their similarity using a statistic adopted from Kornblith et al. (2019). In this statistic, we applied the eigenvectors  $U_i = [u_1, \dots, u_n]$  from a metric tensor  $H_i$  at position  $z_i$  to the metric tensor  $H_j$  at  $z_j$ , as  $u_i^T H_j u_i$ . These values formed a vector  $\Lambda_{ij}$ , representing the effects of metric  $H_j$  on eigenvectors of  $H_i$ . Then we computed the Pearson correlation coefficient between  $\Lambda_{ij}$  and the target eigenvalues,  $\Lambda_j$ , as  $\text{corr}(\Lambda_j, \Lambda_{ij})$ . This correlation measured the similarity of the action of metric tensors on eigenframes around different positions. As the spectrum usually spanned several orders of magnitude, we computed the correlation on the log scale  $C_{ij}^{H \log}$ , where the eigenvalues distribute more uniformly.

$$\Lambda_{ij} = \text{diag}(U_i^T H(z_j) U_i) \quad (5)$$

$$C_{ij}^H = \text{corr}(\Lambda_{ij}, \Lambda_j), C_{ij}^{H \log} = \text{corr}(\log(\Lambda_{ij}), \log(\Lambda_j)) \quad (6)$$

Using this correlation statistic, we computed the consistency of the metric tensor across hundreds of positions within each GAN latent space. As shown in Fig. 3C, the average correlation between eigenvalues and vHv values of two points  $C_{ij}^{Hlog}$  was 0.934 in BigGAN. For DCGAN-type architecture, mean correlations on the log scale ranged from 0.92-0.99; for StyleGAN-1,2, 0.64-0.73 in the Z space, and 0.87-0.89 in the W space (Fig. 3D, Tab.4). Overall, this shows that the local directions that induce image changes of different orders of magnitude are highly consistent at different points in the latent space. Because of this, the notion of a "global" Hessian makes sense, and we estimated it for each latent space by averaging the Hessian matrices at different locations.

**Implication of the Null Space** As the spectra have a large portion of small eigenvalues and the metric tensors are correlated in space, the bottom eigenvectors create a global subspace, in which latent traversal will result in small or even imperceptible changes in the image. This is supported by our perceptual study, as over half of the subjects cannot see any change in image when latent vector move in bottom eigenspace. (Sec. 6). This perceptually "null" space has implications about exploration in the GAN space and interpretable axes discovery. As  $G(z+v) \approx G(z)$ , if one axis  $u$  encodes an interpretable transform  $G(z) \rightarrow G(z+u)$ , then shifting this vector by a vector in the null space  $v$  will still result in an interpretable axis  $G(z) \rightarrow G(z+v+u) \approx G(z+u)$ . Thus, each interpretable axis have a family of "equivalent" axis which encode similar transforms, differing from each other by a vector in "null" space. However, adding component  $v$  in the null space will decrease the rate of image change along that axis. In this sense, the vectors using a smallest step size to achieve that transform should be the "purest" axis of the family. Further, cosine angle between two interpretable axis may not represent the similarity of the transforms they encodes. A large angle can be found between two axes of the same family but different image traversal speed. We compared the axes from previous works in A.9 and observed that projecting out a large part of their axes will not affect the semantics encoded in it (Fig. 8).

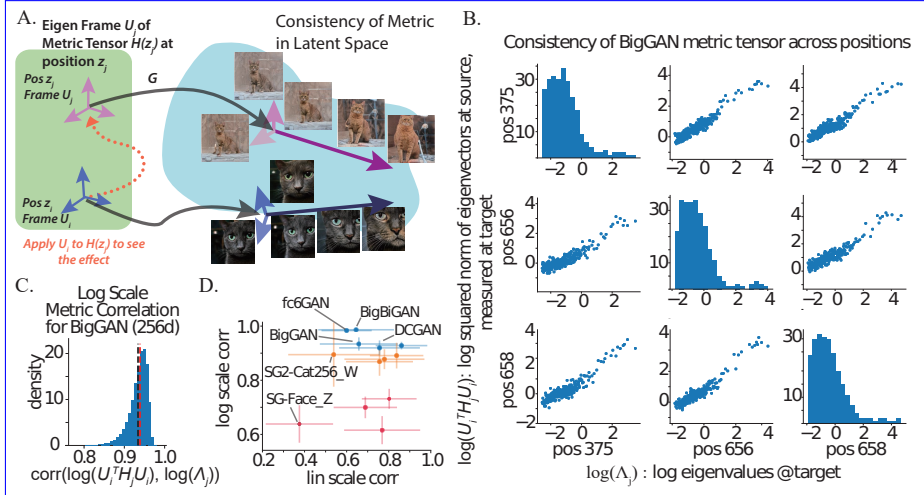

Figure 3: **Globalization of metric structure:** A. **Conceptual schematic behind Schematic of the geometric picture.** In the latent space (green area), the metric eigenvectors at each point (blue and violet) form a local frame, which map to transformations in image space (blue area); the length and saturation of image-space vectors represent the eigenvalue (i.e. amplification factor) of  $G$ . We show the directions with large amplification factors are relatively aligned at different positions. B. Distributions of  $\log(\Lambda_{ij})$  and  $\log(\Lambda_j)$ , showing the action of metric are correlated at 3 different points. C. Histogram of correlation  $C_{ij}^{Hlog}$  between all pairs among 1000 points in BigGAN space. D. Comparison of correlation values on linear and log scales for different GAN models. DCGAN-type (blue), Z and W space for StyleGAN1,2 (red and orange).

## 5 MECHANISM

Above, we showed an intriguingly consistent geometric structure across multiple GANs. Next, we sought to understand how this structure emerged through network architecture and training.

To link the metric tensor to the generator architecture, it is helpful to highlight the relationship between the metric tensor and Jacobian matrix  $H(z) = J_{\varphi \circ G}^T J_{\varphi \circ G}$  (Eq. 3). As latent space gets

warped and mapped onto image space, directions in latent spaces are scaled differently by the Jacobian of the map; specifically, directions that undergo the most amplification will become the top eigenvectors (Fig. 4A). As the Jacobian of the generator is a composition of Jacobians of each layer  $d\psi_i$ , the scaling effect on the image manifold is a product of the scaling effects of each intermediate layer. We can analyze the scaling effect of different layers  $\psi_i$  by applying a set of vectors onto the metric tensors of these layers  $H_{\psi_i}$ . In BigGAN, when we apply the eigenvectors of the first few layers onto the metric of other layers, the top eigenvectors are still strongly amplified by subsequent layers, thus forming the top eigendimensions of the manifold. Of note, this is not true for a weight-shuffled control BigGAN: in that case, the top eigendimension of the first few layers was not particularly amplified on the image manifold, and vice versa (Fig. 4B). This shows that the amplification effect of layers ~~become~~ *becomes* more aligned through training, with the top eigenspace shared across layers. Further, as the amplification effects are not lined up across layers of weight shuffled networks, these networks should exhibit a more isotropic geometry on their image manifold. Indeed, we find their spectra to be flatter and the largest eigenvalue smaller (Fig. 7).

~~This finding unifies previous unsupervised methods that discover interpretable axes in the GAN space (Härkönen et al., 2020; Shen & Zhou, 2020; Voynov & Babenko, 2020). As we have showed, the top right singular vectors of the weights (i.e. Jacobian) of the first few layers (as used in Shen & Zhou (2020)), correspond to the top eigenvectors of the metric tensor of image manifold, and these usually relate to interpretable transforms. Similarly, the top principal components (PC) of intermediate layer activations Härkönen et al. (2020) roughly correspond to the top left singular vectors of the Jacobian, thus also to the interpretable top eigenvectors of the metric on the image manifold (although note that these PCs measure the global amplification of the map, not the local amplifications measured by our metric tensor). Finally, (Voynov & Babenko, 2020) discovered interpretable axes by optimizing for axes such that when two latent codes differed by a certain distance along this direction, a trained model could decode this direction out from the generated images. In our framework, it follows that when the axes lie in the top eigenspace, the image difference created will be the largest and thus easier to classify. Thus we show the geometric understanding of GAN image manifold has great explanatory power to all the methods above.~~

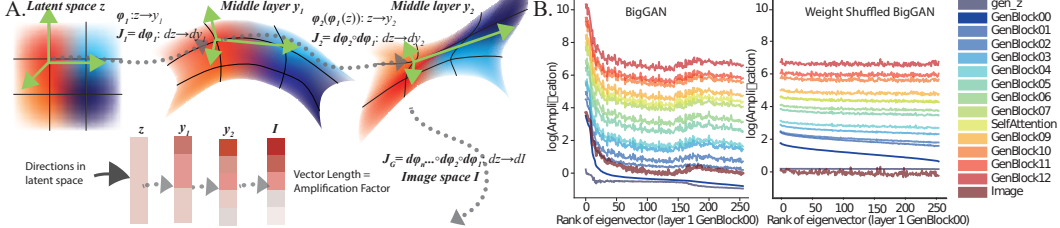

Figure 4: **Anisotropy is induced and maintained throughout the GAN architecture.** A. As latent space gets warped and mapped into image space, directions in latent spaces are scaled differently by the Jacobian of the map. B. Amplification of eigenvectors of the metric tensor of the first conv layer (GenBlock00) in all major layers in BigGAN. C. Same, but for weight-shuffled BigGAN.

## 6 APPLICATION APPLICATIONS

By defining the geometry of the latent space via the metric tensor, we gain an understanding of which directions in this space are more informative than others. This understanding leads to improvements in three applications: 1) gradient descent-based optimizers, 2) accelerating gradient-free search, 3) finding human-interpretable axes in the latent space.

**Improving Gradient-Based GAN Inversion.** For applications like GAN-assisted drawing and photo editing (Zhu et al., 2016; Shen et al., 2020), one crucial step is to find a latent code corresponding to a given natural image (termed GAN inversion). For this problem, one basic approach is to minimize the distance between a generated image and the target image  $z^* = \arg \min_z D(G(z), I)$ . Although second-order information (Hessian) is valuable in optimization, they are seldom used as they are expensive to compute and update. However, because we find that local Hessian information is highly correlated at different points in latent space, we can pre-compute it once for each latent space and use the average Hessian information to boost first-order optimization. As an example,

ADAM is a first-order optimization algorithm that adapts the learning rate of each parameter separately according to the moments of gradients on that parameter (Kingma & Ba, 2014). It can be seen as a quasi-second order optimizer that approximates a diagonal Hessian matrix based on first-order information. However, if the true Hessian is far from diagonal, i.e. the space is anisotropic and the valley is not aligned with the coordinates, then this approximation could work poorly.

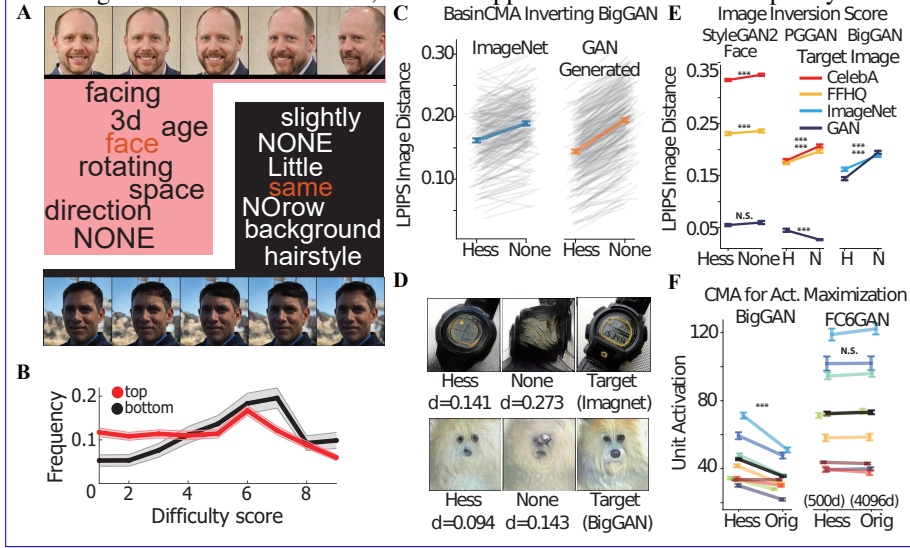

Figure 5: **Left Applications of the metric tensor A. Perceptual properties of eigenvectors.** Word cloud shows subjects’ descriptions ( $N = 24$ ) of the image transforms induced by the top- (red) vs. the bottom eigenvector (black) in StyleGAN2-Face. **B. Distribution of difficulty scores associated with top- vs. bottom eigenvectors (red, BasinCMA with Hessian-eigenbasis parametrization (Hess) outperform method using normal basis (None) black) across all four GANs for  $N=185$  subjects.** Lines show mean frequency  $\pm$  standard error (per bootstrap). **C-E. Eigenbasis pre-conditioning improves GAN inversion.** C. BasinCMA with eigenbasis pre-conditioning (Hess,H) outperformed a method using normal basis (None,N) in minimizing distance to inverting ImageNet and BigGAN generated images; **Right, Hessian-CMAES (Hess) outperforms CMAES (Orig) in maximizing CNN activation** D. Examples of fitted ImageNet and BigGAN images with our Hessian BasinCMA and original method (LPIPS distance below). **E. Results for PGGAN and StyleGAN2 inverting samples from CelebA and FFHQ. F. Hessian-CMAES (Hess) outperforms CMAES (Orig) in maximizing CNN activation in BigGAN, and increases sampling efficiency in FC6GAN latent space.** Color denotes the Each line represents a different layer of the optimized units in AlexNet. **Bottom, two examples of fitting ImageNet and BigGAN images with our Hessian BasinCMA and original method, with LPIPS distance below.\*\*\* denotes paired t-test  $p < 1 \times 10^{-6}$**

To test whether the metric can help overcome this problem, we used the eigenvectors of the average Hessian to rotate the latent space; this orthogonal change of variables should make the Hessian more diagonal and thus accelerate ADAM. This method can be seen as a preconditioning step which could be inserted into any pipeline involving ADAM. We tested this modification on the state-of-the-art algorithm for inverting BigGAN, i.e. BasinCMA (Huh et al., 2020), which interleaves ADAM and CMAES steps. We used our Hessian eigenbasis in the ADAM steps, and found that we could consistently lower the fitted distance to the target when inverting ImageNet and BigGAN-generated images (Zhang et al., 2018) (Fig. 5). **Thus this Similarly, eigenbasis preconditioning consistently improved inversion of PGGAN and StyleGAN2-Face for real image sampled from both FFHQ and CelebA using ADAM method. In short, the** understanding of homogeneity and anisotropy of the latent space can improve gradient-based optimization.

**Improving Gradient-Free Search in Image Space** In some domains, it is important to optimize objectives in the absence of a gradient, for example, in black-box attacks against image recognition systems via adversarial images, or when searching for activity-maximizing stimuli for neurons in primate visual cortex (Ponce et al., 2019; Xiao & Kreiman, 2020), or when optimizing perceptual evaluation in the user (Ponce et al., 2019; Xiao & Kreiman, 2020; Chiu et al., 2020). These applications usually involve a low-dimensional parameter space (such as GANs) and an efficient gradient-



free search algorithm, such as covariance matrix adaptation evolution strategy or CMAES. CMAES explores the latent space using a Gaussian distribution and adapts the shape of the Gaussian (covariance matrix) according to the search history and local landscape. However, online learning of a covariance matrix in high-dimensional space is computationally costly, and inaccurate knowledge of it can be detrimental to optimization. Here we applied the prior geometric knowledge of the space to build the covariance matrix instead of learning it from scratch. For example, as illustrated by natural gradient descent (Amari, 1998), one simple heuristic for optimizing on the image manifold is to move in smaller steps along dimensions that change the image faster and vice versa. We used this heuristic to improve CMAES (a combined approach we refer to as CMAES-Hessian). With our method, the search can be limited to the most informative directions, which should increase sampling efficiency, and as the space is anisotropic, our method further tunes the exploration step size in a way that is inversely proportional to the rate of image change. To test this approach, we applied the novel CMAES-Hessian algorithm to the problem of searching for activation maximizing stimuli for units in AlexNet (Nguyen et al., 2016) in the latent space of two GANs (FC6GAN and BigGAN). We found that the dimensionality of the search space could be reduced from 4096 to 500 for FC6GAN ~~GAN~~ without impairing maximal activation values. Further, we found that CMAES-Hessian consistently led to higher activation values compared to the classic CMAES algorithm in BigGAN space (Fig. 5).

**Interpretable Axes Discovery for Image Manipulation** When users wish to manipulate GAN-based images via their latent code, it ~~would be~~ is useful to reduce the number of variables needed to effectuate this given manipulation. Our method provides a systematic way to compute the most informative axes (top eigenspace) in the latent space to use as variables, and the resulting eigenvalues can serve to compute appropriate step sizes along each corresponding axes. We applied this method to FC6GAN, BigGAN, BigBiGAN, StyleGAN1,2, PGGAN, and plotted the changes corresponding to the top eigenvectors (Fig. 1). These eigenvectors ~~corresponded to semantic meaningful transformations like zooming in and out~~ appeared to capture interpretable transformations like zooming, head direction and object ~~location. Moreover, eigenvectors usually corresponded to a similar position.~~

To test if this was apparent to people other than the authors, we conducted a study using Amazon’s Mechanical Turk. We tested the perceptual properties of the axes identified by the metric tensor, including the top 10 eigenvectors, random vectors orthogonal to the top 15d eigenspace, and bottom 10 eigenvectors. Images were generated using four different GANs (PGGAN, BigGAN noise space, StyleGAN2-Cat and -Face), and were presented to 185 participants. In each trial, five randomly sampled reference images were perturbed along a given axis, and participants were asked if they could a) perceive a change, b) indicate an estimate of its magnitude [0%-100%] c) describe a common change in their own words and how many of the five images shared this change, c) indicate how similar were the 5 image changes (consistency, score of 1-9, 9 most similar) and finally, d) state how difficult it was to describe this change (difficulty score, scale of 1-9, 9 most difficult).

Only 48.5% of the subjects reported to see any change happen for bottom eigenvectors, the fraction was 93.5% and 89.8% for top and orthogonal directions respectively. Further, when subjects observed some change, they reported that the image transformations induced by top eigenvectors were larger ( $70.3\% \pm 0.6\%$ ) than those of orthogonal directions ( $66.8\% \pm 0.9\%$ ,  $P = 7.0 \times 10^{-4}$ , 2 sample T-test) and than those of bottom eigenvectors ( $61.5\% \pm 1.6\%$ ,  $P = 2.1 \times 10^{-10}$ ). This was true even though we picked a 5-10 times smaller step size in the top eigenspace than in the orthogonal and bottom eigenspaces. Further, subjects reported the top 10 eigenvectors had a higher mean perceptual consistency score ( $6.72 \pm 0.06$ ,  $n = 929$  responses) than the orthogonal ( $6.42 \pm 0.09$ ,  $P = 5.8 \times 10^{-3}$ ,  $n = 448$ ) and bottom eigenvectors ( $6.12 \pm 0.14$ ,  $P = 1.3 \times 10^{-5}$ ,  $n = 242$ ). Participants reported that the top eigenvectors were easier to interpret ( $4.91 \pm 0.08$ ) than the bottom eigenvectors ( $5.69 \pm 0.14$ ,  $P = 3.8 \times 10^{-6}$ , albeit comparably to the orthogonal eigenvectors  $4.82 \pm 0.11$ ,  $P = 0.5$ ). Thus, overall we conclude that the Hessian eigenvectors not only capture informative axes of image transformations, but that these were also perceptually relevant, corresponding to similar semantic changes when applied to different reference vectors (Fig. 10) ~~, so the eigenvectors we discovered were~~ axes interpretable not just in local sense, but in a global sense. ~~Thus we could compute the average metric tensor once for each latent space and use their top eigendimensions as handles for image manipulation.~~



## 7 DISCUSSION AND FUTURE DIRECTIONS

In this work, we developed an efficient and architecture-agnostic way to compute the geometry of the manifold learnt by generative networks. This method discovers axes accounting for the largest variation in image transformation, which frequently represent semantically interpretable changes. Subsequently, this geometric method can facilitate image manipulation, increase explainability, and accelerate optimization on the manifold (with or without gradients).

There have been multiple efforts directed at identifying interpretable axes in latent space using unsupervised methods, including (Härkönen et al., 2020; Shen & Zhou, 2020; Voynov & Babenko, 2020). Our described connection between the metric tensor of the image manifold and the Jacobian matrices of intermediate layers unifies these previous results. As we have showed, the top right singular vectors of the weights (i.e. Jacobian) of the first few layers (as used in Shen & Zhou (2020)), correspond to the top eigenvectors of the metric tensor of the image manifold, and these usually relate to interpretable transforms (as will be shown in Sec.6). Similarly, the top principal components (PCs) of intermediate layer activations Härkönen et al. (2020) roughly correspond to the top left singular vectors of the Jacobian, thus also to the interpretable top eigenvectors of the metric on the image manifold (although note that these PCs measure the global amplification of the map, not the local amplifications measured by our metric tensor). Regarding (Voynov & Babenko, 2020), we empirically compared their interpretable axes and our eigenvectors, and found that in some of the GANs, the discovered axes have a significantly larger alignment with our top eigenspace and they are highly concentrated on individual top axes than expected from random mixing. We refer the reader to Appendix A.9 and Fig.8 for further information.

Although we have answered how the anisotropy comes into being mechanistically, there remains the question of why it should exist at all. Anisotropy may result from gradient training: theoretical findings on deep-linear networks for classification show that gradient descent aligns the weights of layers, resulting in a highly anisotropic Jacobian (Ji & Telgarsky, 2018). Whether that analysis transfers to the setting of generative networks remains to be investigated.

Alternatively, assuming that a well-trained GAN faithfully represents the data distribution, this anisotropy may reveal the intrinsic dimensionality of the data manifold. Statistical dependencies of variation in real-world images (e.g. uniform changes in skin color, head direction) imply that the images reside in a statistical manifold of much lower dimension. Further, among transformations that happen on this manifold, there will be some dimensions that transform images a lot and some that do not (e.g. skin color versus facial expression). In that sense, our method may be equivalent to performing a type of nonlinear PCA of the image space through the generator map. In fact, we have found that GANs trained on similar datasets (e.g. PGGAN, StyleGAN1,2 trained on the human face dataset [CelebA, FFHQ]) have top eigenvectors that represent the same set of transforms (e.g. head direction, gender, age; Fig. 9). This supports the "PCA" hypothesis, as these transformations may account for much of the pixelwise variability in face space; the GANs are able to learn to represent these transformations as linear directions, which our method can then identify.

This further raises the intriguing possibility that if the dataset is actually distributed on a lower dimensional space, one could learn generators with smaller latent spaces; or alternatively, it may be easier to learn generators with large latent spaces and reduce them after intensive training. These are questions worth exploring.

AUTHOR CONTRIBUTIONS

ACKNOWLEDGMENTS

REFERENCES

- Shun-Ichi Amari. Natural gradient works efficiently in learning. *Neural computation*, 10(2):251–276, 1998.
- Shun-ichi Amari. *Information geometry and its applications*, volume 194. Springer, 2016.
- Georgios Arvanitidis, Lars Kai Hansen, and Søren Hauberg. Latent space oddity: on the curvature of deep generative models. *arXiv preprint arXiv:1710.11379*, 2017.

- Andrew Brock, Jeff Donahue, and Karen Simonyan. Large scale gan training for high fidelity natural image synthesis. *arXiv preprint arXiv:1809.11096*, 2018.
- Nutan Chen, Alexej Klushyn, Richard Kurle, Xueyan Jiang, Justin Bayer, and Patrick Smagt. Metrics for deep generative models. In *International Conference on Artificial Intelligence and Statistics*, pp. 1540–1550. PMLR, 2018.
- Chia-Hsing Chiu, Yuki Koyama, Yu-Chi Lai, Takeo Igarashi, and Yonghao Yue. Human-in-the-loop differential subspace search in high-dimensional latent space. *ACM Trans. Graph.*, 39(4), July 2020. ISSN 0730-0301. doi: 10.1145/3386569.3392409. URL <https://doi.org/10.1145/3386569.3392409>.
- Jeff Donahue and Karen Simonyan. Large scale adversarial representation learning. In *Advances in Neural Information Processing Systems*, pp. 10542–10552, 2019.
- Alexey Dosovitskiy and Thomas Brox. Generating images with perceptual similarity metrics based on deep networks. In *Advances in neural information processing systems*, pp. 658–666, 2016.
- Ahmed Elgammal, Bingchen Liu, Mohamed Elhoseiny, and Marian Mazzone. Can: Creative adversarial networks, generating” art” by learning about styles and deviating from style norms. *arXiv preprint arXiv:1706.07068*, 2017.
- Behrooz Ghorbani, Shankar Krishnan, and Ying Xiao. An investigation into neural net optimization via hessian eigenvalue density. In *International Conference on Machine Learning*, pp. 2232–2241, 2019.
- Erik Härkönen, Aaron Hertzmann, Jaakko Lehtinen, and Sylvain Paris. Ganspace: Discovering interpretable gan controls. *arXiv preprint arXiv:2004.02546*, 2020.
- Minyoung Huh, Richard Zhang, Jun-Yan Zhu, Sylvain Paris, and Aaron Hertzmann. Transforming and projecting images into class-conditional generative networks. *arXiv preprint arXiv:2005.01703*, 2020.
- Ziwei Ji and Matus Telgarsky. Gradient descent aligns the layers of deep linear networks. *arXiv preprint arXiv:1810.02032*, 2018.
- Tero Karras, Timo Aila, Samuli Laine, and Jaakko Lehtinen. Progressive growing of gans for improved quality, stability, and variation. *arXiv preprint arXiv:1710.10196*, 2017.
- Tero Karras, Samuli Laine, and Timo Aila. A style-based generator architecture for generative adversarial networks. In *Proceedings of the IEEE conference on computer vision and pattern recognition*, pp. 4401–4410, 2019.
- Tero Karras, Samuli Laine, Miika Aittala, Janne Hellsten, Jaakko Lehtinen, and Timo Aila. Analyzing and improving the image quality of stylegan. In *Proceedings of the IEEE/CVF Conference on Computer Vision and Pattern Recognition*, pp. 8110–8119, 2020.
- Diederik P Kingma and Jimmy Ba. Adam: A method for stochastic optimization. *arXiv preprint arXiv:1412.6980*, 2014.
- Simon Kornblith, Mohammad Norouzi, Honglak Lee, and Geoffrey Hinton. Similarity of neural network representations revisited. *arXiv preprint arXiv:1905.00414*, 2019.
- Richard B Lehoucq, Danny C Sorensen, and Chao Yang. *ARPACK users’ guide: solution of large-scale eigenvalue problems with implicitly restarted Arnoldi methods*. SIAM, 1998.
- Anh Nguyen, Alexey Dosovitskiy, Jason Yosinski, Thomas Brox, and Jeff Clune. Synthesizing the preferred inputs for neurons in neural networks via deep generator networks. In *Advances in neural information processing systems*, pp. 3387–3395, 2016.
- Richard S Palais. On the differentiability of isometries. *Proceedings of the American Mathematical Society*, 8(4):805–807, 1957.
- Marcos Pividori, Guillermo L Grinblat, and Lucas C Uzal. Exploiting gan internal capacity for high-quality reconstruction of natural images. *arXiv preprint arXiv:1911.05630*, 2019.

- Carlos R Ponce, Will Xiao, Peter F Schade, Till S Hartmann, Gabriel Kreiman, and Margaret S Livingstone. Evolving images for visual neurons using a deep generative network reveals coding principles and neuronal preferences. *Cell*, 177(4):999–1009, 2019.
- Alec Radford, Luke Metz, and Soumith Chintala. Unsupervised representation learning with deep convolutional generative adversarial networks. *arXiv preprint arXiv:1511.06434*, 2015.
- Hang Shao, Abhishek Kumar, and P Thomas Fletcher. The riemannian geometry of deep generative models. In *Proceedings of the IEEE Conference on Computer Vision and Pattern Recognition Workshops*, pp. 315–323, 2018.
- Yujun Shen and Bolei Zhou. Closed-form factorization of latent semantics in gans. *arXiv preprint arXiv:2007.06600*, 2020.
- Yujun Shen, Jinjin Gu, Xiaoou Tang, and Bolei Zhou. Interpreting the latent space of gans for semantic face editing. In *Proceedings of the IEEE/CVF Conference on Computer Vision and Pattern Recognition*, pp. 9243–9252, 2020.
- A Van der Sluis and HA Van der Vorst. The convergence behavior of ritz values in the presence of close eigenvalues. *Linear Algebra and its Applications*, 88:651–694, 1987.
- Andrey Voynov and Artem Babenko. Unsupervised discovery of interpretable directions in the gan latent space. *arXiv preprint arXiv:2002.03754*, 2020.
- Tom White. Sampling generative networks. *arXiv preprint arXiv:1609.04468*, 2016.
- Will Xiao and Gabriel Kreiman. Xdream: Finding preferred stimuli for visual neurons using generative networks and gradient-free optimization. *PLoS computational biology*, 16(6):e1007973, 2020.
- Xinru Yuan, Wen Huang, Pierre-Antoine Absil, and Kyle A Gallivan. Averaging symmetric positive-definite matrices. In *Handbook of Variational Methods for Nonlinear Geometric Data*, pp. 555–575. Springer, 2020.
- Richard Zhang, Phillip Isola, Alexei A Efros, Eli Shechtman, and Oliver Wang. The unreasonable effectiveness of deep features as a perceptual metric. In *Proceedings of the IEEE conference on computer vision and pattern recognition*, pp. 586–595, 2018.
- Jun-Yan Zhu, Philipp Krähenbühl, Eli Shechtman, and Alexei A Efros. Generative visual manipulation on the natural image manifold. In *European conference on computer vision*, pp. 597–613. Springer, 2016.

## A APPENDIX

### A.1 CONNECTION TO INFORMATION GEOMETRY

It is useful to compare our work to the “information geometry”(Amari, 2016) on the space of distributions. In this formulation, KL divergence is a pseudo-metric function on the space of distributions, and its Hessian matrix towards parameters of distribution is the Fisher information matrix. In information geometry, this Fisher information matrix could be considered as the metric on the manifold of distributions; this metric information can be further used to assist optimization on the manifold of distributions, termed natural gradient descent.(Amari, 1998) In our formulation, the squared image difference function  $D^2$  is analogous to this KL-divergence; the image  $G(z)$  as parameterized by latent code  $z$  is analogous to the distribution  $p_\theta$  parameterized by  $\theta$ . The metric tensor we computed is comparable to the Fisher information matrix in their setting. Thus our way of using metric information to assist optimization on manifold is analogous to natural gradient descent.

Table 1: **Computational Cost for Three Methods:** Computation time is measured on a GTX 1060 GPU. Note that the iterative method ~~are has a variable in-runtime due to different speed which depends on the number of convergence eigenpairs you require. In this table, we all use one half of the full dimension as the eigenpairs required, which is the largest we can require using ARPACK implementation of Lanczos. Thus these numbers should be seen as an upper limit of time for Backward and Forward Iteration method.~~ A shallower or narrower network will result in faster computation time. For StyleGAN2 which has configurable depth and width, we use the config-f.

|            | Dimension | Full BackProp<br>Time | Backward Iter<br>Time | Forward Iter<br>Time |
|------------|-----------|-----------------------|-----------------------|----------------------|
| DCGAN      | 120       | 12.5                  | 13.4                  | 6.9                  |
| FC6 GAN    | 4096      | 282.4                 | 101.2                 | 90.2                 |
| BigGAN     | 256       | 69.4                  | 70.6                  | 67                   |
| BigBiGAN   | 120       | 15.3                  | 15.2                  | 13.3                 |
| PGGAN      | 512       | 95.4                  | 95.7                  | 61.2                 |
| StyleGAN   | 512       | 112.8                 | 110.5                 | 64.5                 |
| StyleGAN2* | 512       | 221                   | 217                   | 149                  |

## A.2 METHODS FOR COMPUTING THE HESSIAN

One direct way to compute the Hessian towards a given objective (e.g. squared distance  $d^2$  in our case), is to compute  $g_{z_0}(z) = \partial_z d^2|_{z=z_0}$ , create a computational graph from code  $z$  to the gradient  $g_{z_0}(z)$ , and back propagate from gradient vector  $g_{z_0}(z)$  element by element. In this way the computational time is linear to time of a single backward pass times the hidden space dimension  $n$ .

Given a large hidden space or a deep network (e.g. 4096d in FC6GAN, or 512d in StyleGAN2), this method can be very slow. However, as the eigenspace of small eigenvalues represent directions that do not change images much, the exact eigenvector does not matter. An efficient way is to use the Hessian vector product (HVP) operator and iterative eigenvalue algorithms to find the eigenvectors corresponding to eigenvalues of high amplitudes. In Power Iteration or Lanczos Iterations, the Hessian vector product is used to find the largest amplitude eigen pairs. However, to find the smallest amplitude eigen pairs, Inverse Hessian vector product operator is required, it is much more expensive to compute such operator, but practically, there is little practical use for those dimensions. Thus we can define an arbitrary basis in the "null" space complementing to the eigenspace with higher amplitude eigenvalues.

There are two ways of constructing a Hessian vector product operator: one way requires the computational graph from  $z$  to the gradient  $g(z)$ , and computes the HVP by back-prop, i.e.  $HVP_{backward}$ ; the other way is to use the first-order gradient and finite difference to compute HVP i.e.  $HVP_{forward}$ . As it doesn't require backpropagation, a single operation of  $HVP_{forward}$  is much faster than  $HVP_{backward}$  but it is less accurate and takes more iterations to converge. We use the ARPACK(Lehoucq et al., 1998) implementation of the Lancosz algorithm as the iterative eigenvalue solver,

$$HVP_{backward} : v \mapsto \partial_z(v^T g(z)) \quad (7)$$

$$HVP_{forward} : v \mapsto \frac{g(z + \epsilon v) - g(z - \epsilon v)}{2\epsilon \|v\|} \quad (8)$$

We denote the direct method Full BackProp (BP), the iterative method using  $HVP_{backward}$  and  $HVP_{forward}$  Backward Iteration and Forward Iteration respectively. Empirically, we computed the Hessian at the same  $z_0$  using these three methods in different GANs and compared their temporal cost in Table A.2.

Note, our method can be employed to compute the singular values and right singular vectors of the Jacobian from latent space towards any intermediate layer representation. To obtain the left singular vector, we need to push forward the right singular vectors through the Jacobian, which is feasible through forward-mode autodiff or finite difference.

### A.3 SPECIFICATION OF GAN LATENT SPACE

The pretrained GANs used in the paper are from the following sources.

**DCGAN** model is obtained from torch hub [https://pytorch.org/hub/facebookresearch\\_pytorch-gan-zoo\\_dcgan/](https://pytorch.org/hub/facebookresearch_pytorch-gan-zoo_dcgan/). It's trained on 64 by 64 pixel fashion dataset. It has a 120d latent space, using Gaussian as latent space distribution.

**Progressive Growing GAN (PGGAN)** is obtained from torch hub [https://pytorch.org/hub/facebookresearch\\_pytorch-gan-zoo\\_pgan/](https://pytorch.org/hub/facebookresearch_pytorch-gan-zoo_pgan/) and we use the 256 pixel version. It's trained on celebrity faces dataset (CelebA). It has a 512d latent space, using Gaussian as latent space distribution.

**DeePSim, FC6GAN** model is customly rewritten and translated into pytorch, with weights obtained from official page <https://lmb.informatik.uni-freiburg.de/people/dosovits/code.html> of Dosovitskiy & Brox (2016). The architecture is designed to mirror that of AlexNet, and the FC6GAN model is trained to invert AlexNet's mapping from image to FC6 layer. Thus it has 4096 d latent space. This model is highly expressive, but not particularly photorealistic.

**BigGAN** model is obtained through huggingface's translation of DeepMind's Tensorflow implementation <https://github.com/huggingface/pytorch-pretrained-BigGAN>, we use biggan-deep-256 version. It's trained on ImageNet dataset in a class conditional way. It has a 128d latent space called noise space, and a 128d embedding space for the 1000 classes called class space. The 2 vectors are concatenated and sent into the network. The distribution used to sample in noise space is truncated normal. Here we analyze the metric tensor computed in the concatenated 256d space (BigGAN) or in the 128d noise space or class space separately (BigGAN-noise, class).

**BigBiGAN** model is obtained via a translation of DeepMind's Tensorflow implementation <https://tfhub.dev/deepmind/bigbigan-resnet50/1>, we use bigbigan-resnet50 version. It's trained on ImageNet dataset in unconditioned fashion. It has a 120d latent space, using Gaussian as latent distribution. Note, the latent vector is split into six 20d trunks and sent into different parts of the model, which explains why the spectrum of BigBiGAN has the staircase form (in Fig. 2).

**StyleGAN** model is obtained via a translation of NVIDIA's Tensorflow implementation <https://github.com/rosinality/style-based-gan-pytorch>. We use the 256 pixel output. It has a 512d latent space called  $Z$  space, where the latent distribution is Gaussian distribution. This  $Z$  distribution gets warped into another 512d latent space called  $W$  space, by a multi-layer perceptron. The latent vector  $W$  is sent into a style-based generative network, in which the latent vector modulates the feature maps in the conv layers, instead of just serves as a spatial input as in DCGAN, FC6GAN, PGGAN. We analyzed the geometry of  $Z$  space and  $W$  space separately, and find that the metric in  $W$  space is significantly flatter and more homeogeneous!

**StyleGAN2** models are obtained via a translation of NVIDIA's Tensorflow implementation <https://github.com/rosinality/stylegan2-pytorch>. It's similar to StyleGAN: it has a similar structure of the 512d  $Z$  and  $W$  space, and the style-based generative network. The various pre-trained models are fetched from <https://pythonawesome.com/a-collection-of-pre-trained-stylegan-2-models-to-download>. More specifically StyleGAN2-Face256 and 512 are both trained on FFHQ dataset, while Face256 generate lower resolution images and use narrower conv layers. StyleGAN2-Cat is trained on LSUN cat dataset at 512 resolution.

**WaveGAN** model is obtained from the repository <https://github.com/mostafaelaraby/wavegan-pytorch/>. Its architecture resembles that of DCGAN, but applied in 1 dimension wave form generation problem. We customly trained it on the wave forms from clips of piano performance. It has a 100d latent space, using Gaussian as latent space distribution.

### A.4 QUANTIFICATION OF POWER DISTRIBUTION IN SPECTRA

We quantified the anisotropy of the space, i.e. the low rankness of the metric tensor in Table 2. To do this, we computed the number of eigenvalues needed such that their sum will account for a



Table 2: **Quantification of Spectra anisotropy** (Models marked with † are audio wave form generating GANs.)

|                     | dimen | dim.99 | dim.999 | dim.9999 | dim.99999 |
|---------------------|-------|--------|---------|----------|-----------|
| FC6                 | 4096  | 297    | 502     | 661      | 848       |
| DCGAN-fashion       | 120   | 17     | 35      | 65       | 97        |
| BigGAN              | 256   | 10     | 53      | 149      | 224       |
| BigGAN_noise        | 128   | 29     | 88      | 120      | 127       |
| BigGAN_class        | 128   | 8      | 38      | 98       | 123       |
| BigBiGAN            | 120   | 21     | 41      | 62       | 73        |
| PGGAN-face          | 512   | 57     | 167     | 325      | 450       |
| StyleGAN-face_Z     | 512   | 12     | 27      | 52       | 84        |
| StyleGAN2-face512_Z | 512   | 7      | 17      | 41       | 78        |
| StyleGAN2-face256_Z | 512   | 13     | 28      | 63       | 103       |
| StyleGAN2-cat_Z     | 512   | 8      | 14      | 31       | 62        |
| StyleGAN-face_W     | 512   | 124    | 355     | 480      | 507       |
| StyleGAN2-face512_W | 512   | 153    | 345     | 471      | 506       |
| StyleGAN2-face256_W | 512   | 157    | 350     | 473      | 506       |
| StyleGAN2-cat_W     | 512   | 23     | 57      | 126      | 269       |
| WaveGAN_MSE†        | 100   | 17     | 38      | 74       | 94        |
| WaveGAN_STFT†       | 100   | 2      | 9       | 19       | 42        |

fraction of 0.99, 0.999, 0.9999, 0.99999 of the sum of all eigenvalues. This can be thought of as the fraction of dimensions one needs to achieve a low rank approximation of the Jacobian with 0.01, 0.001, 0.0001, 0.00001 residue in terms of the Frobenius norm.

#### A.5 GEOMETRIC STRUCTURE IS ROBUST TO THE IMAGE DISTANCE METRIC

Our work used the LPIPS distance metric to compute the Riemannian metric tensor. To determine how much of the results depended on this choice of metric, we computed the metric tensor at the same hidden vector using different image distance functions, specifically a) structural similarity index measure (SSIM) and b) Mean Squared Error (MSE) in pixel space, which do not depend on CNN. We computed the Hessian at 100 random sampled vectors in BigGAN, Progressive Growing GAN (Face), StyleGAN2 (Face 256), using MSE, SSIM and LPIPS, and then compared the Hessian spectrum and eigenvectors. We found that the entry-wise correlation across the Hessian matrices ( $d^2$  elements) ranged from [0.94-0.99]. The correlation of eigenvalue spectra ranged from [0.987-0.995]. Measuring Hessian similarity using the statistics we derived  $C^{Hlog}$  and  $C^{Hlin}$  resulted in correlations concentrated at 0.99. Thus, we found that the Hessian matrix and its spectra were highly correlated across image distance metrics, and that the Hessian matrices had a similar effect on the eigenvectors of each other.

One major difference across Hessians from different Image Distance Metric was evident in the scale of the eigenvalues. We regressed the log Hessian spectra induced by SSIM or MSE onto the log Hessian spectrum induced by LPIPS, and found the intercepts of the regression were usually not zeros (Tab. 5). This result showed different image distance metrics exhibit different "unit" or intrinsic scale, although they all factored out the same structure in the GAN.

This result is contextualized by Section 5. As equation 3 showed, the Riemannian metric or Hessian of the GAN manifold is the inner product matrix of the Jacobian of the representational map. The effect of image difference metric on the Riemannian metric is to add a few more terms to the top of the chain of Jacobians. The Jacobian terms from the layers of GAN seem to have a larger effect than the final terms coming from the image dissimilarity metric.

Note that this doesn't mean that the choice of sample space distance function is irrelevant. Going beyond image generation, when applying our method to an audio generating GAN, the WaveGAN, we found that the choice of distance function in the space of sound waves will substantially affect the Hessian obtained. We used the MSE of wave forms and MSE of spectrograms (denoted by STFT) to compute metric tensor of that sound wave manifold. We found the element-wise Hessian correlation between these is around 0.53, while the other Hessian similarity metric are also lower

Table 3: **Similarity of Hessian Computed with Different Sample Dissimilarity Metric  $d$**  We experimented with BigGAN, PGGAN and StyleGAN2 (FFHQ 256 resolution), we compared the Hessian computed by LPIPS and that by MSE or SSIM at 100 hidden vectors. The statistics we showed are: element-wise Hessian correlation (H corr), eigen spectra correlation (eigval corr), the Hessian consistency measure  $C^{Hlin}$  and  $C^{Hlog}$ . The linear regression between the log spectra of LPIPS the and that of the alternative (SSIM or MSE) yields the slope (reg slope) and intercept (reg intercept). The mean and standard deviation (in parenthesis) of the the 100 statistics are shown. In the final row, WaveGAN<sup>†</sup> is an audio generating GAN. We measured the similarity of the Hessian using MSE of wave forms (MSE) and the MSE of spectrogram (noted by STFT) as dissimilarity metric. Hessian computed using these two measures are less similar to each other.

|                      |          | H corr       | eigval corr  | $C^{Hlin}_n$ | $C^{Hlog}$   | reg slope    | reg intercept |
|----------------------|----------|--------------|--------------|--------------|--------------|--------------|---------------|
| BigGAN               | MSE      | 0.973(0.033) | 0.995(0.008) | 0.996(0.014) | 0.999(0.001) | 1.006(0.027) | 1.467(0.21)   |
|                      | SSIM     | 0.988(0.012) | 0.997(0.003) | 0.999(0.002) | 0.999(0.001) | 1.057(0.021) | -0.404(0.07)  |
| PGGAN                | MSE      | 0.938(0.047) | 0.987(0.016) | 0.987(0.038) | 0.999(0.000) | 1.023(0.020) | 1.746(0.19)   |
|                      | SSIM     | 0.970(0.020) | 0.993(0.009) | 0.997(0.007) | 0.999(0.000) | 1.056(0.012) | -0.234(0.10)  |
| StyleGAN2            | MSE      | 0.945(0.035) | 0.989(0.011) | 0.990(0.020) | 0.987(0.011) | 1.133(0.155) | 1.324(0.33)   |
|                      | SSIM     | 0.945(0.047) | 0.987(0.015) | 0.988(0.027) | 0.991(0.008) | 1.075(0.182) | -0.174(0.26)  |
| WaveGAN <sup>†</sup> | MSE-STFT | 0.529(0.229) | 0.892(0.088) | 0.661(0.313) | 0.938(0.062) | 1.088(0.052) | 4.673(0.30)   |

than the counterparts for BigGAN, PGGAN and StyleGAN2 (5). We think the MSE of spectrograms are better and more perceptual distance measure of sound wave than MSE of wave forms, and this difference are reflected in their geometry property i.e. anisotropy and homogeneity (Tab. 2, 4). Thus, when and how the sample space distance metric will affect the geometry of generative model still requires more development to be answered.

#### A.6 RANDOM MIXING OF SPECTRA

Here we give a simple derivation of why a highly ill-conditioned Hessian matrix may appear normal, under the probe of random vectors. Given a symmetric matrix  $H$ , and its eigen decomposition  $U\Lambda U^T$ , we computed its effect on an isotropic random vector  $\mathbf{v}$ ,  $\alpha(\mathbf{v}) = \mathbf{v}^T H \mathbf{v} / \mathbf{v}^T \mathbf{v}$ , and  $\mathbf{v} \sim \mathcal{N}(0, I)$ . This random variable represents the effect of the symmetric matrix on random directions.

Note that a change of variable using the orthogonal matrix  $\mathbf{w} = U^T \mathbf{v}$  will not change the distribution  $\mathbf{w} \sim \mathcal{N}(0, I)$ . Through this the random variable  $\alpha$  could be rewritten as

$$\alpha(\mathbf{v}) = \frac{\mathbf{v}^T H \mathbf{v}}{\mathbf{v}^T \mathbf{v}} = \sum_i \lambda_i \frac{\|\mathbf{u}_i^T \mathbf{v}\|_2^2}{\|\mathbf{v}\|_2^2}, \quad \mathbf{v} \sim \mathcal{N}(0, I) \quad (9)$$

$$= \sum_i \lambda_i w_i^2 / \sum_i w_i^2, \quad w_i \sim \mathcal{N}(0, I) \quad i = 1, 2, \dots, d \quad (10)$$

$$= \frac{1}{\sum_i w_i^2} \sum_i \lambda_i w_i^2 = \sum_i c_i \lambda_i \quad (11)$$

$$c_i := w_i^2 / \sum_i w_i^2 \quad (12)$$

As each element in  $\mathbf{w}$  is distributed as i.i.d. unit normal,  $w_i^2$  is distributed as i.i.d. chi-square distribution of parameter 1.  $w_i^2 \sim \chi^2(1) \sim \Gamma(\frac{1}{2}, \frac{1}{2})$ . Thus the normalized weights  $c_i = w_i^2 / \sum_i w_i^2$  conform to a Dirichlet distribution  $\mathbf{c} \sim \text{Dirichlet}(\frac{1}{2}, \frac{1}{2}, \dots, \frac{1}{2})$ . Through moment formula of Dirichlet distribution, it is straightforward to compute the mean and variance of  $\alpha(\mathbf{w}) = \mathbf{c}^T \boldsymbol{\lambda}$

$$\mathbb{E}[\alpha] = \lambda^T \mathbb{E}[\mathbf{c}] = \frac{1}{n} \sum_i \lambda_i \quad (13)$$

$$\text{Var}[\alpha] = \lambda^T \text{Cov}[\mathbf{c}] \lambda = \frac{2}{n(n+2)} \sum_i \lambda_i^2 - \frac{2}{n^2(n+2)} (\sum_i \lambda_i)^2 \quad (14)$$

$$\text{Var}[\lambda] = \frac{1}{n} \sum_i \lambda_i^2 - \frac{1}{n^2} (\sum_i \lambda_i)^2 = \frac{n+2}{2} \text{Var}[\alpha] \quad (15)$$

As we can see, the variance of the effect on random directions scales  $1/n$  relative to the variance of original eigenvalue distribution. This is why the distribution is much tighter than the whole eigenvalue distribution.

This phenomenon may explain why the perceptual path length regularization as used in Karras et al. (2020) doesn't really result in a flat spectrum. This regularization is to minimize  $\mathbb{E}_v \|\alpha(v) - b\|^2$ , which is to minimize the variance of the distribution of  $\alpha(v)$  with  $v$  sampled from normal distribution, as in Fig. 6. The global minimizer for this regularization is indeed a mapping with flat spectrum. However, through our derivation, we can see even for highly anisotropic spectrum, this variance will not be very large. Thus we should expect a limited effect of this regularization.

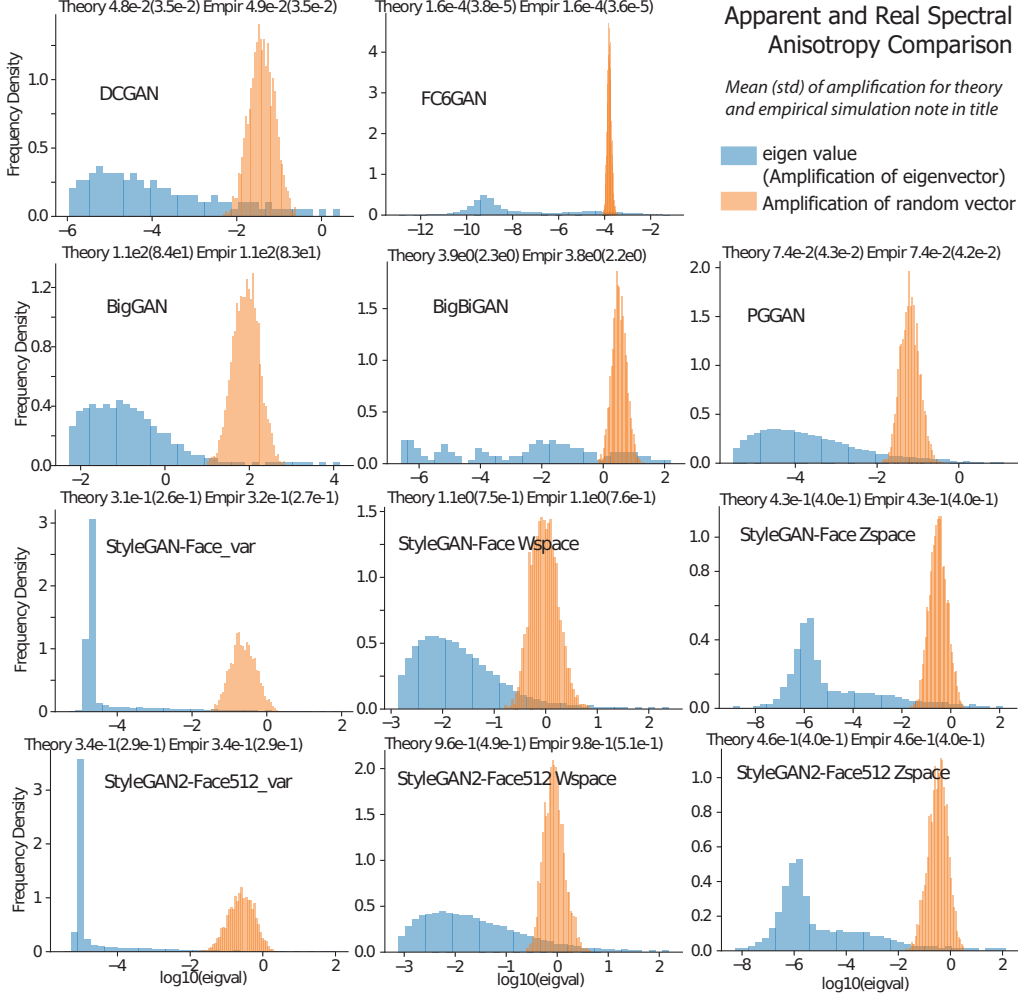

Figure 6: **Spectral Histogram compared to Apparent Anisotropy in Different GAN models** (FC6GAN, DCGAN, BigGAN, BigBiGAN, PGGAN, StyleGAN, StyleGAN2) The apparent speed of image change  $\alpha(v)$  has much smaller variability than the variability in the whole spectra. Eq. 13 can predict the mean and std of the apparent variability.

#### A.7 METHOD TO QUANTIFY METRIC SIMILARITY

We developed our own statistic to quantify the similarity of metric tensor between different points. Here we discuss the benefits and caveats of it.

Angles between eigenvectors *per se* are not used, because eigenvectors are likely to rotate into each other when computing eigendecomposition in the presence of close-by eigenvalues (Van der Sluis

& Van der Vorst, 1987). However, the statistics should be invariant to this eigenvector mixing, and take the eigenvalues into account. We applied the eigenvectors  $U_1 = [\mathbf{u}_{1,i}, \dots]$  of one matrix  $H_1$  to the other  $H_2$  and examined the length of these vectors as measured by the other matrix as the metric tensor,  $\alpha_{H_2}(\mathbf{u}_{1,i}) = \mathbf{u}_{1,i}^T H_2 \mathbf{u}_{1,i}$ . Recall that  $\alpha_{H_1}(\mathbf{u}_{1,i}) = \mathbf{u}_{1,i}^T H_1 \mathbf{u}_{1,i} = \lambda_{1,i}$  and  $\alpha_{H_2}(\mathbf{u}_{2,i}) = \mathbf{u}_{2,i}^T H_2 \mathbf{u}_{2,i} = \lambda_{2,i}$ . If the eigenvectors fall in the eigenspace of the same eigenvalue in  $H_2$ , then  $\alpha(\mathbf{u}_{1,i})$  will equal the eigenvalue, and thus our statistic is invariant to rotation within the eigenspace. If the eigenvectors are totally uncorrelated, the resulting  $\alpha(\mathbf{u}_{1,i})$  will distribute in a tight distribution. As we compute the correlation between the eigenvalue  $\lambda_{2,i} = \alpha_{H_2}(\mathbf{u}_{2,i})$  and the  $\alpha_{H_2}(\mathbf{u}_{1,i})$ , we summarize the similarity of action of  $H_2$  on eigenvectors  $U_1$  and  $U_2$ .

However, this method assumes an anisotropy of spectra in both metric tensors. For example, if both tensors are identity matrices  $H_1 = H_2 = I$ , then this correlation will give NaN, as there is no variation in the spectra to be correlated. Similarly, if metric has a spectrum closer to flat, then it will generally have a smaller correlation with others. In that sense, spectral anisotropy also plays a part in our statistics for metric similarity or homogeneity of the manifold. In all the GAN space we examined, there is a strong anisotropy in the metric spectra, thus this correlation works fine. But there is caveat for comparing this correlation between two GANs when there is also difference in the anisotropy in their spectra, as a smaller anisotropy can also results in a smaller metric similarity.

Finally, we are aware that several measures of distance in the space of symmetric positive definite matrices (SPSD) have been proposed (Yuan et al., 2020). Thus, there are different ways to compute an average metric tensor using these distance function. Here we picked the simplest one: averaging the metric tensors element by element.

Table 4: **Quantification of Manifold Homogeneity** by metric consistency  $C_{ij}^H$  on log scale and linear scale. Same data generating Fig. 3 D. Models marked with † are audio wave form generating GANs.

|                      | Log scale    |              | Linear Scale |              |
|----------------------|--------------|--------------|--------------|--------------|
|                      | mean         | std          | mean         | std          |
| FC6GAN               | 0.984        | 0.002        | 0.600        | 0.119        |
| DCGAN                | 0.920        | 0.028        | 0.756        | 0.192        |
| BigGAN               | 0.934        | 0.024        | 0.658        | 0.186        |
| BigBiGAN             | 0.986        | 0.007        | 0.645        | 0.180        |
| PGGAN                | 0.928        | 0.014        | 0.861        | 0.123        |
| StyleGAN-Face_Z      | 0.638        | 0.069        | 0.376        | 0.160        |
| StyleGAN2-Face512_Z  | 0.616        | 0.052        | 0.769        | 0.181        |
| StyleGAN2-Face256_Z  | 0.732        | 0.037        | 0.802        | 0.130        |
| StyleGAN2-Cat256_Z   | 0.700        | 0.040        | 0.689        | 0.151        |
| StyleGAN-Face_W      | 0.878        | 0.037        | 0.780        | 0.190        |
| StyleGAN2-Face512_W  | 0.891        | 0.048        | 0.838        | 0.127        |
| StyleGAN2-Face256_W  | 0.869        | 0.052        | 0.756        | 0.159        |
| StyleGAN2-Cat256_W   | 0.895        | 0.118        | 0.539        | 0.216        |
| <u>WaveGAN_MSE†</u>  | <u>0.906</u> | <u>0.022</u> | <u>0.776</u> | <u>0.139</u> |
| <u>WaveGAN_STFT†</u> | <u>0.809</u> | <u>0.096</u> | <u>0.467</u> | <u>0.285</u> |

## A.8 GEOMETRIC STRUCTURE OF WEIGHT-SHUFFLED GANS

Here we show the geometric analysis for the shuffled controls for all our GANs. Specifically, we shuffled the elements of each layer weight tensor to keep the overall weight distribution unchanged. To show how learning affected the geometry of the image manifold, we computed the spectra and the associated metric consistency statistic for weight-shuffled GANs<sup>2</sup>.

In Fig. 7, we showed that the shuffled controls exhibited a flatter spectrum and a smaller top eigenvalue. There, the correlation of metric tensors in shuffled GANs shows an unclear result. In some

<sup>2</sup>We were unable to obtain a sensible spectra for either shuffled or randomly initialized BigBiGAN possibly due to its architecture; but we show the comparison for all other models.

GANs, there remains strong correlations in the metrics across locations, while in some, the correlation is close to zero. We think the reason is that our statistic for homogeneity (i.e. a correlation of action of metric tensors  $C_{ij}^{Hlog}$ ) somewhat entangles homogeneity with the anisotropy of the space. That is, when the space has a totally flat spectrum (the map is isometric), then the correlation coefficient of action will be zero, although the metric tensor will be the same everywhere. Thus the change of anisotropy and the change of homogeneity may interfere with each other, thus shuffling can result in a mixed result. We are working to develop new statistics that will measure the similarity of the Hessian, invariant of anisotropy.

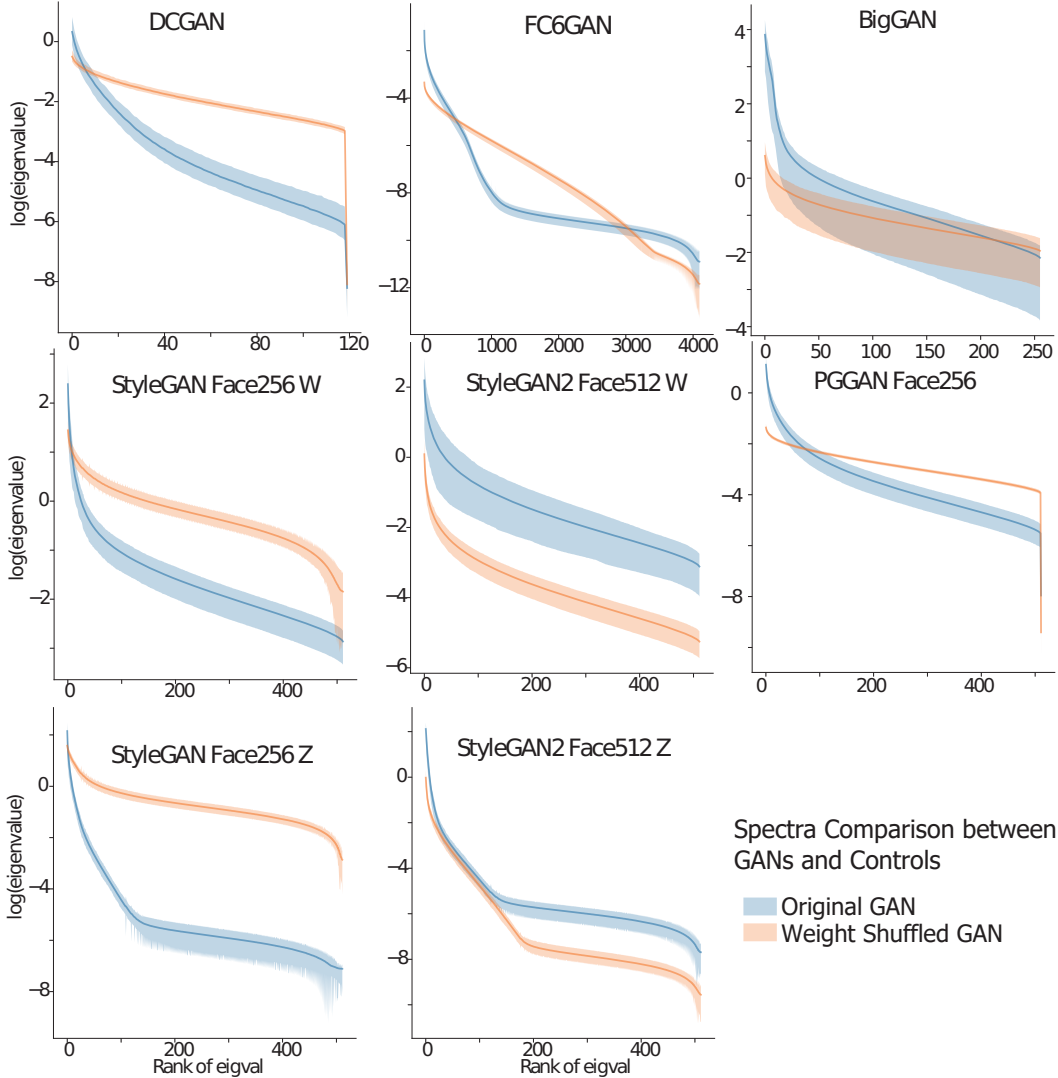

Figure 7: **Comparing Spectra of Original and Weight Shuffled GANs:** Most Shuffled GAN shows a slower spectral decay and a smaller maximum eigenvalue.

#### A.9 DETAILED COMPARISON TO PREVIOUS UNSUPERVISED WAYS TO DISCOVER INTERPRETABLE AXES

Here we compare the axes discovered by our method with those from a previous approach. Specifically, we applied our method to the same pre-trained GANs used in Voynov & Babenko (2020), comparing the axes they discovered versus our Hessian structure. Although this method follows a much more different approach compared to ours and those of



Table 5: **Hessian preconditioning improves GAN inversion** The mean and standard error of fitting score (minimum LPIPS distance to target using 4 random initial vectors) are noted in the table, which is the same data generating 5

| GAN          | Target Image | Hessian |       | None  |       |
|--------------|--------------|---------|-------|-------|-------|
|              |              | Mean    | SEM   | Mean  | SEM   |
| StyleGAN1024 | CelebA       | 0.334   | 0.002 | 0.344 | 0.002 |
| StyleGAN1024 | FFHQ         | 0.231   | 0.003 | 0.236 | 0.003 |
| StyleGAN1024 | GANgen       | 0.055   | 0.002 | 0.060 | 0.003 |
| PGGAN        | CelebA       | 0.179   | 0.003 | 0.207 | 0.003 |
| PGGAN        | FFHQ         | 0.175   | 0.003 | 0.197 | 0.003 |
| PGGAN        | GANgen       | 0.045   | 0.003 | 0.027 | 0.001 |
| BigGAN       | ImageNet     | 0.162   | 0.003 | 0.189 | 0.003 |
| BigGAN       | GANgen       | 0.144   | 0.003 | 0.195 | 0.003 |

(Härkönen et al., 2020; Shen & Zhou, 2020), we thought it would be interesting to determine if the interpretable axes discovered in their approach had a relationship with the Hessian structure defined above. If so, this could serve as independent confirmation of the effectiveness of both types of approaches.

In their work, for each generative network  $G$ , two additional models were simultaneously trained to discover interpretable axes: a "deformator"  $M$  and a "latent shift predictor"  $P$ . The "deformator"  $M$  learned to propose vectors  $\{v_i\}$  to alter the image, which were used to create images pairs  $(G(z), G(z + v_i))$  using random reference vectors  $z$ ; the "latent shift predictor"  $P$  took in the images pairs and learned to classify the direction in which the latent code shifted  $\hat{v}_i = P(G(z), G(z + v_i))$ . The axes learned by the deformator  $M$  were subsequently annotated and a subset was selected by humans.

Using their code, we compared these annotated axes with the Hessian structure we computed on their GANs (PGGAN512, BigGAN noise and StyleGAN Face). In PGGAN512, we found that their discovered axes had a significantly larger  $v^T H v$  (i.e. approximate rate of image change) than random vectors in that space; in other words, their axes were significantly more aligned with the top eigen space ( $p < 0.05$  for all axes). Further, we wanted to investigate whether their axes aligned with individual eigenvectors identified by our Hessian or whether their axes randomly mixed with our top eigen space. To achieve this goal, we search for the power coefficients that are significantly higher than expected from projection of unit random vector. In fact, for each and every of the discovered axes, we found 1-3 eigenvectors that they are significantly ( $p < 5 \times 10^{-4}$ ) aligned to. Moreover, these strongly aligned eigenvectors are all in our top 60 eigen dimensions, in fact, 3 of their axes aligned with eigenvector 11 and 2 of their axes aligned with our eigenvector 6. (Fig.8 A) Moreover, we "purify" their axes by a) retaining projection coefficients only in top 60 eigenvectors, or b) retaining the coefficients only in the 1-3 strongly aligned eigen vectors and set all the other 500+ coefficients to zero, and compared their effect on a same set of reference vectors, using the same step size. We found that by project out coefficients in the lower space, the image transformation is perceptually very similar (Fig.8 B,C). If we only retains the eigenvectors that it highly aligns to, the image transform will be more different, but the annotated semantics in the transform seems to keep (Fig.8 D,E). Thus, their method also discovered that the top eigenspace of PGGAN contained informative transformations, and further confirmed that optimizing interpretability may improve alignment with individual eigen vectors rather than mixing all the eigen dimensions.

Note, as we project out coefficients, the resulting vector has a smaller than unit norm, thus we are moving a smaller distance in latent space using the same step size (8 B-E title). If we renormalize the vector to unit norm we will need to take a smaller step size to achieve the same transform. This is confirming our predictions in Sec. 4: Each interpretable axis has a family of equivalent axes, which add a direction in the lower eigenspace or null space of the GAN. These axes encode the same transforms but the speeds of image change on them are different. In this sense, the top eigenspace could be used to provide a "purer" version of the interpretable axes discovered elsewhere.

Although both types of approaches are promising, by removing the need to train additional networks, our method can be viewed as a more efficient way to identify informative axes. Further work

comparing axes discovered by different methods will elucidate the connection between interpretable axes and the Hessian structure more.

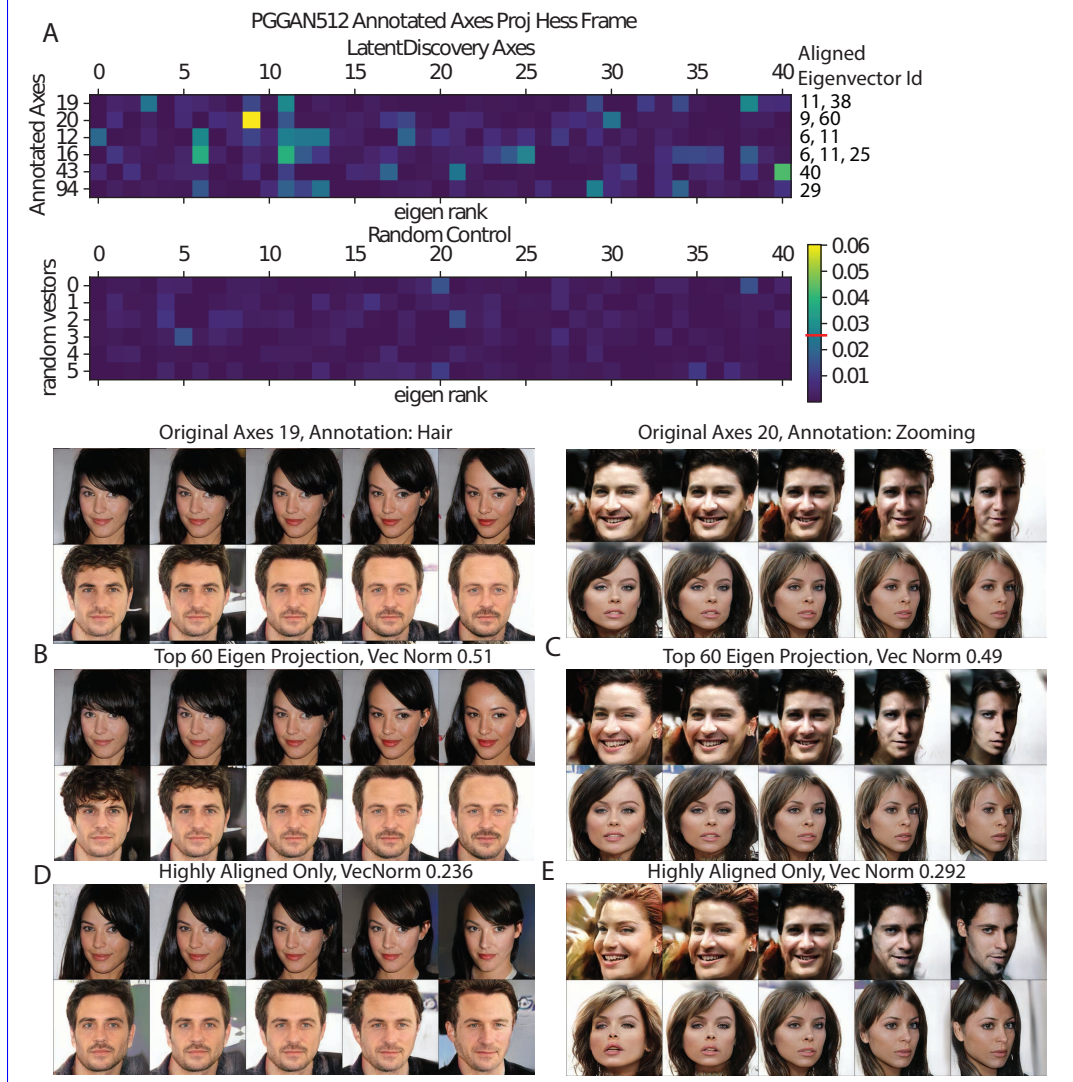

Figure 8: **Analyzing interpretable axes from (Voynov & Babenko, 2020) under the Hessian framework.** A. Projection power of their axes and 6 unit norm random vectors on the top 40 eigen vectors. The color code is matched. The red line on colorbar denotes  $p < 1 \times 10^{-4}$  threshold for the power value, and the significantly aligned axes  $p < 5 \times 10^{-4}$  are indicated. B,C. Image transforms encoded by projection of 2 of their vectors (19, 20) into the top 60d eigenspace. D,E. Similar to B,C, but their vectors are projected onto the aligned eigenvectors only. The norms of the projected vectors are noted on title. Panel B,D and C,E share the same reference image and the same step size across each mini column, though the distance travelled along BC and DE is smaller as the vector is shortened.



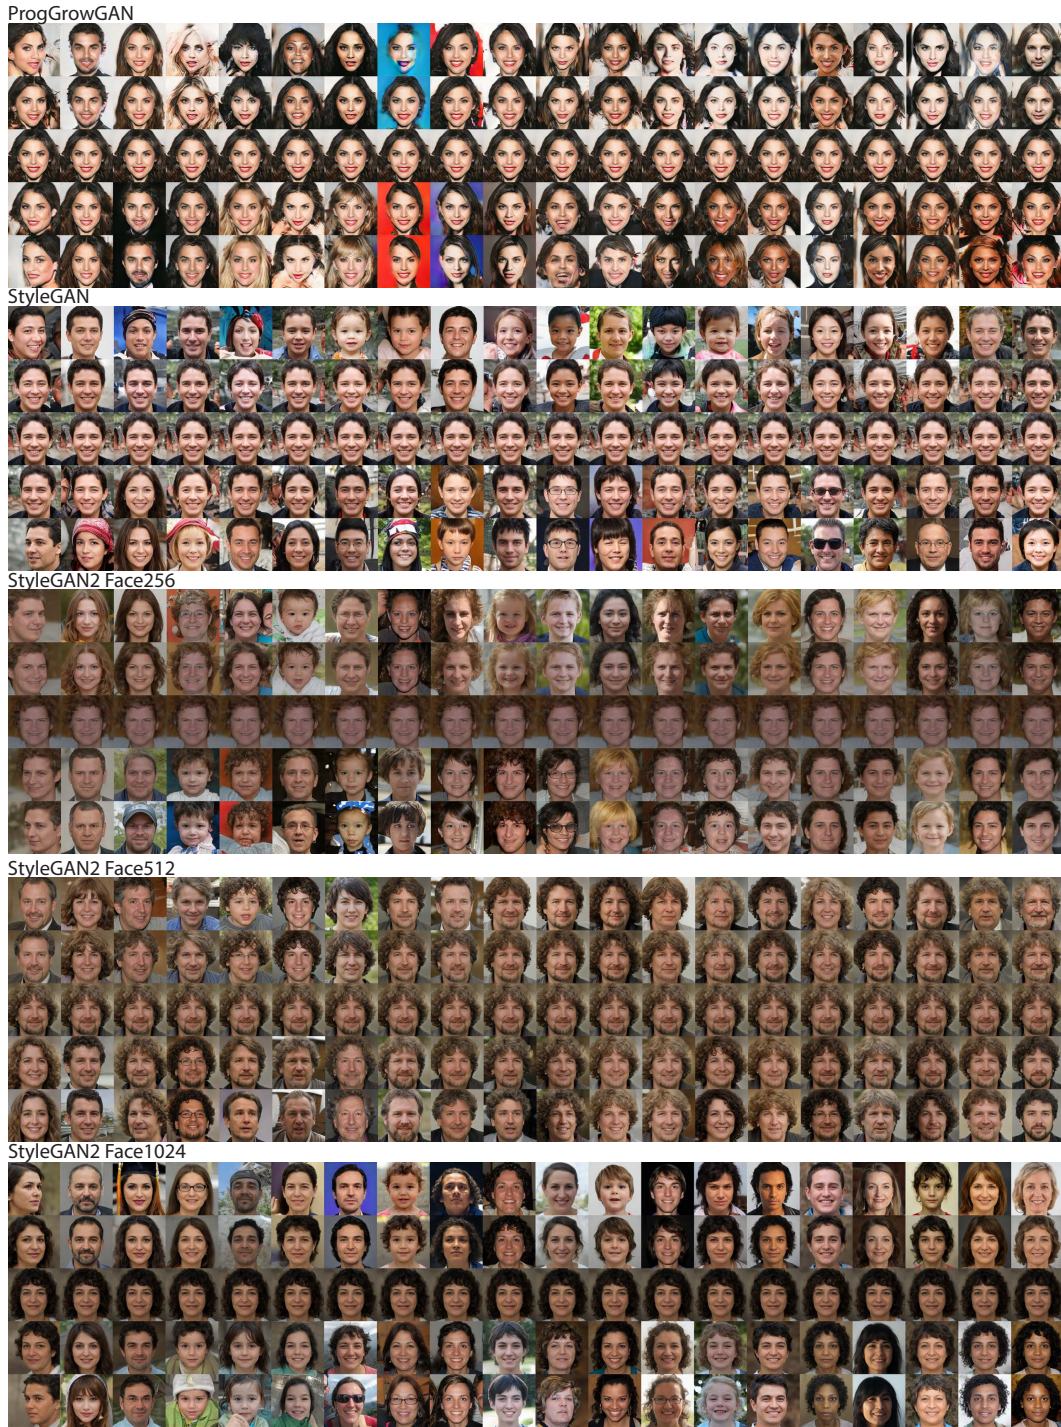

Figure 9: **Similar transforms encoded in the top eigendimension of GANs trained on same face dataset.** Linear exploration along top 20 eigenvectors from origin in latent space are showed for each GAN. Linear equi-distance sampling on each eigenvector occupies a column and their eigenvalues are sorted in descending order from left to right. Step size along each vector is adjusted according to its eigenvalue for best continuity.



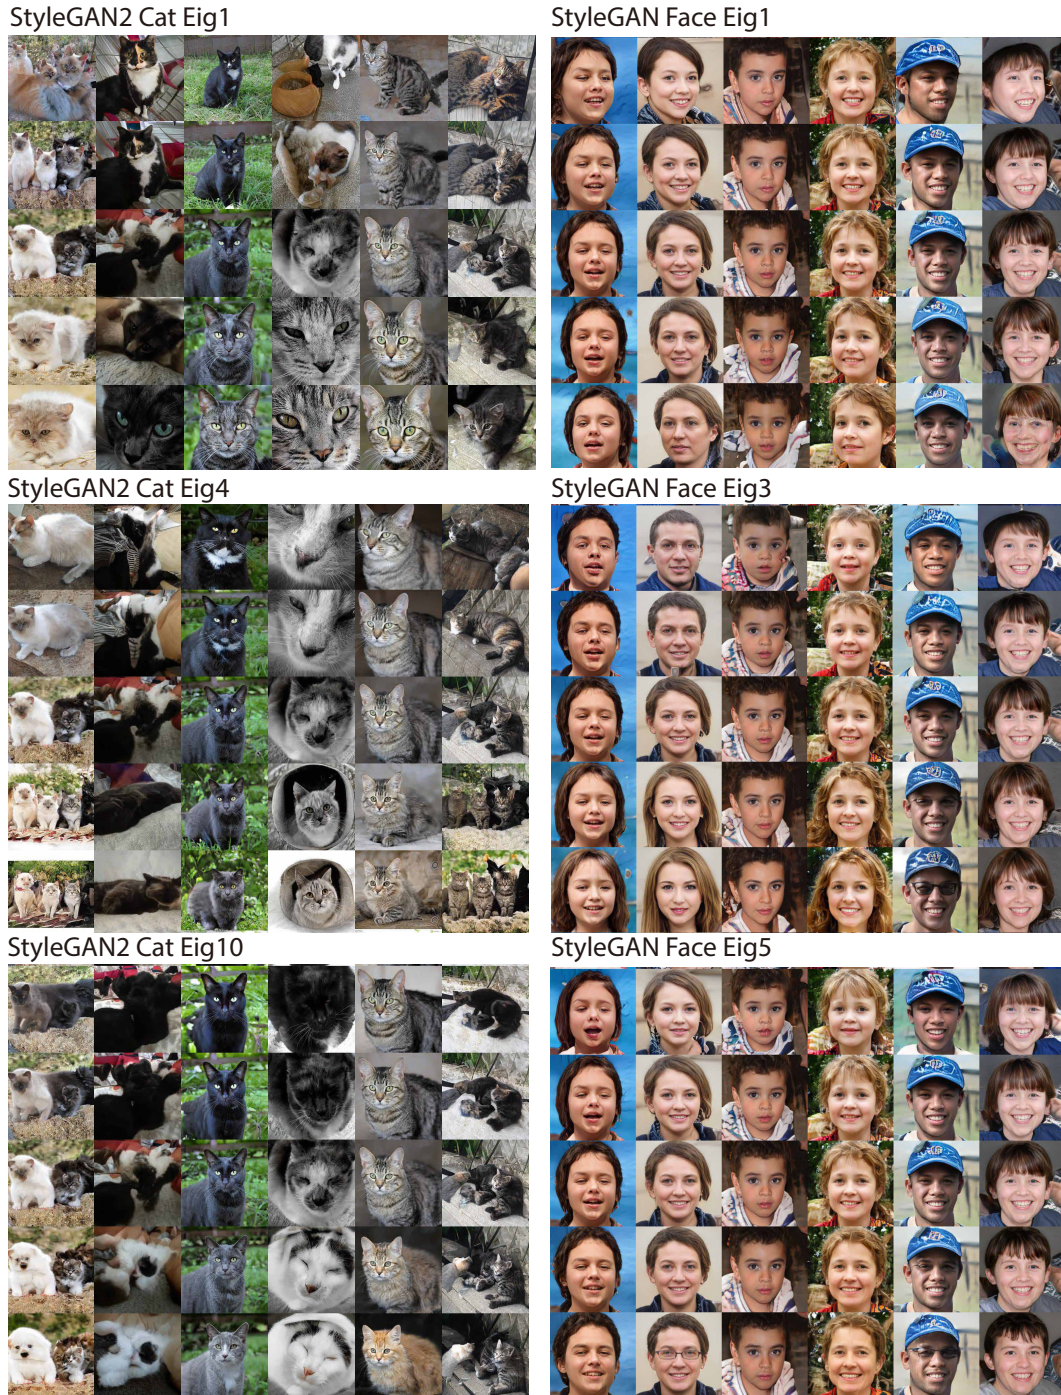

Figure 10: **Top eigenvectors encode similar transforms around different reference images.** Linear equidistant explorations from six randomly chosen reference images along the eigenvectors of averaged Hessians. These show qualitatively similar transforms to images — for example, proximity of Cat face (Eig1), proximity and cat number (Eig4), fur color darkening (Eig10) in StyleGAN2 Cat; face direction (Eig1), masculine vs feminine (Eig3), child vs adult (Eig5) in StyleGAN Face.
